# Supplementary material for: An improved, scalable synthesis of Notum inhibitor LP-922056 using 1-chloro-1,2-benziodoxol-3-one as a superior electrophilic chlorinating agent
Source: publisher site journal article supplement (doi:10.3762/bjoc.15.271), 2019-11-19

C13CPD.ucl DMSO {C:\700} alz 1

169.11  
161.03  
155.77  
153.70  
133.98  
133.96  
125.51

40.00  
39.86  
39.74  
39.62  
39.50  
39.39  
39.27  
39.15  
31.57

9.75  
5.78

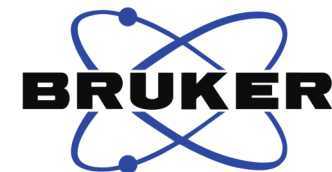

Current Data Parameters  
NAME NW-0016-031-FD  
EXPNO 11  
PROCNO 1

F2 - Acquisition Parameters  
Date\_ 20180111  
Time 5.35 h  
INSTRUM spect  
PROBHD Z123726\_0032 (  
PULPROG zgpg30  
TD 65536  
SOLVENT DMSO  
NS 2048  
DS 4  
SWH 41666.668 Hz  
FIDRES 1.271566 Hz  
AQ 0.7864320 sec  
RG 101  
DW 12.000 usec  
DE 7.48 usec  
TE 298.2 K  
D1 2.00000000 sec  
D11 0.03000000 sec  
TD0 1  
SFO1 176.1207579 MHz  
NUC1 13C  
P1 12.00 usec  
PLW1 64.79000092 W  
SFO2 700.3528014 MHz  
NUC2 1H  
CPDPRG[2] waltz16  
PCPD2 65.00 usec  
PLW2 12.20199966 W  
PLW12 0.73931998 W  
PLW13 0.37228000 W

F2 - Processing parameters  
SI 131072  
SF 176.1032362 MHz  
WDW EM  
SSB 0  
LB 1.00 Hz  
GB 0  
PC 1.40

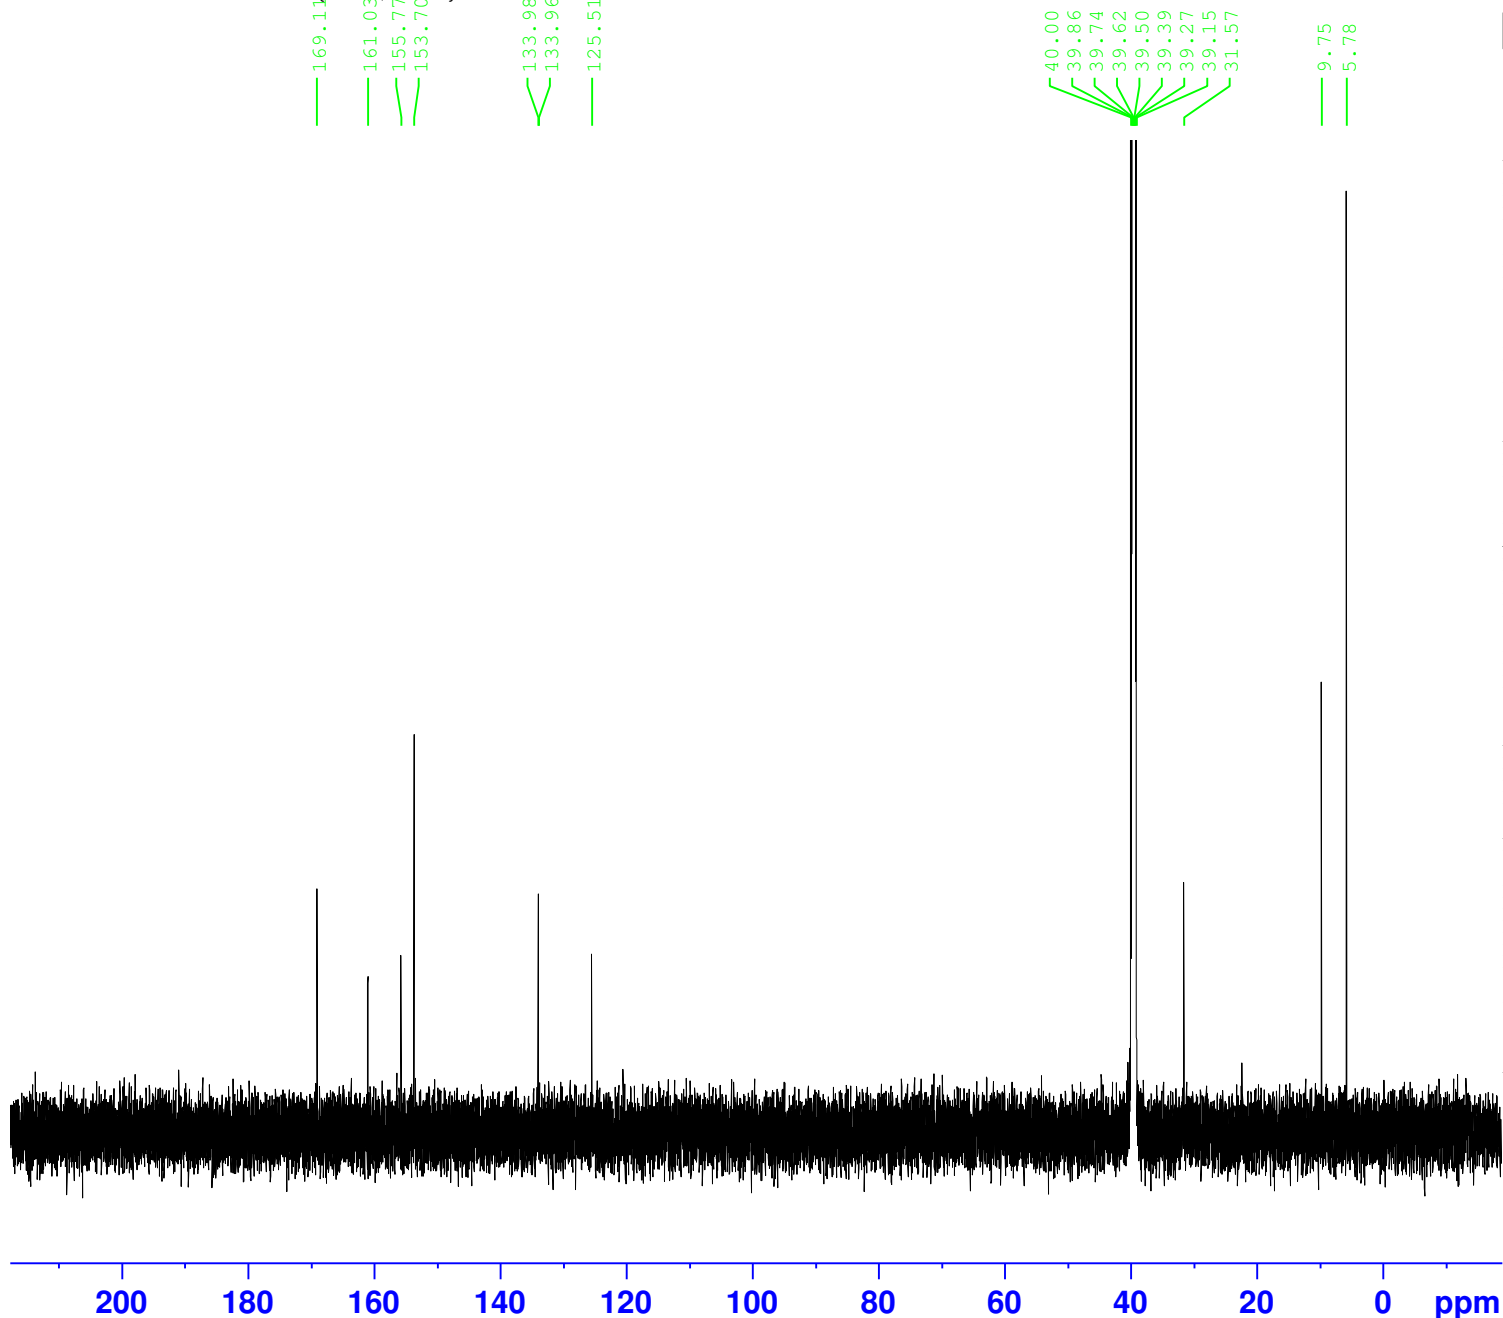

Supplement: Additional file 3 [file 1860-5397-15-271-S3.zip]
