# Supplementary material for: An improved, scalable synthesis of Notum inhibitor LP-922056 using 1-chloro-1,2-benziodoxol-3-one as a superior electrophilic chlorinating agent
Source: publisher site journal article supplement (doi:10.3762/bjoc.15.271), 2019-11-19

PROTON.ucl DMSO {C:\700} alz 1

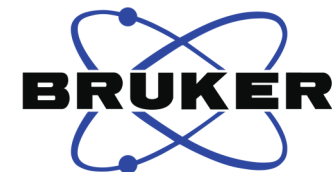

Current Data Parameters  
NAME NW-0016-031-FD  
EXPNO 10  
PROCNO 1

F2 - Acquisition Parameters  
Date\_ 20180110  
Time 13.32 h  
INSTRUM spect  
PROBHD Z123726\_0032 (  
PULPROG zg30  
TD 111110  
SOLVENT DMSO  
NS 32  
DS 2  
SWH 13888.889 Hz  
FIDRES 0.250003 Hz  
AQ 3.9999599 sec  
RG 101  
DW 36.000 usec  
DE 6.64 usec  
TE 298.2 K  
D1 1.00000000 sec  
TD0 1  
SFO1 700.3543247 MHz  
NUC1 1H  
P1 16.00 usec  
PLW1 12.20199966 W

F2 - Processing parameters  
SI 131072  
SF 700.3500126 MHz  
WDW EM  
SSB 0  
LB 0.30 Hz  
GB 0  
PC 1.00

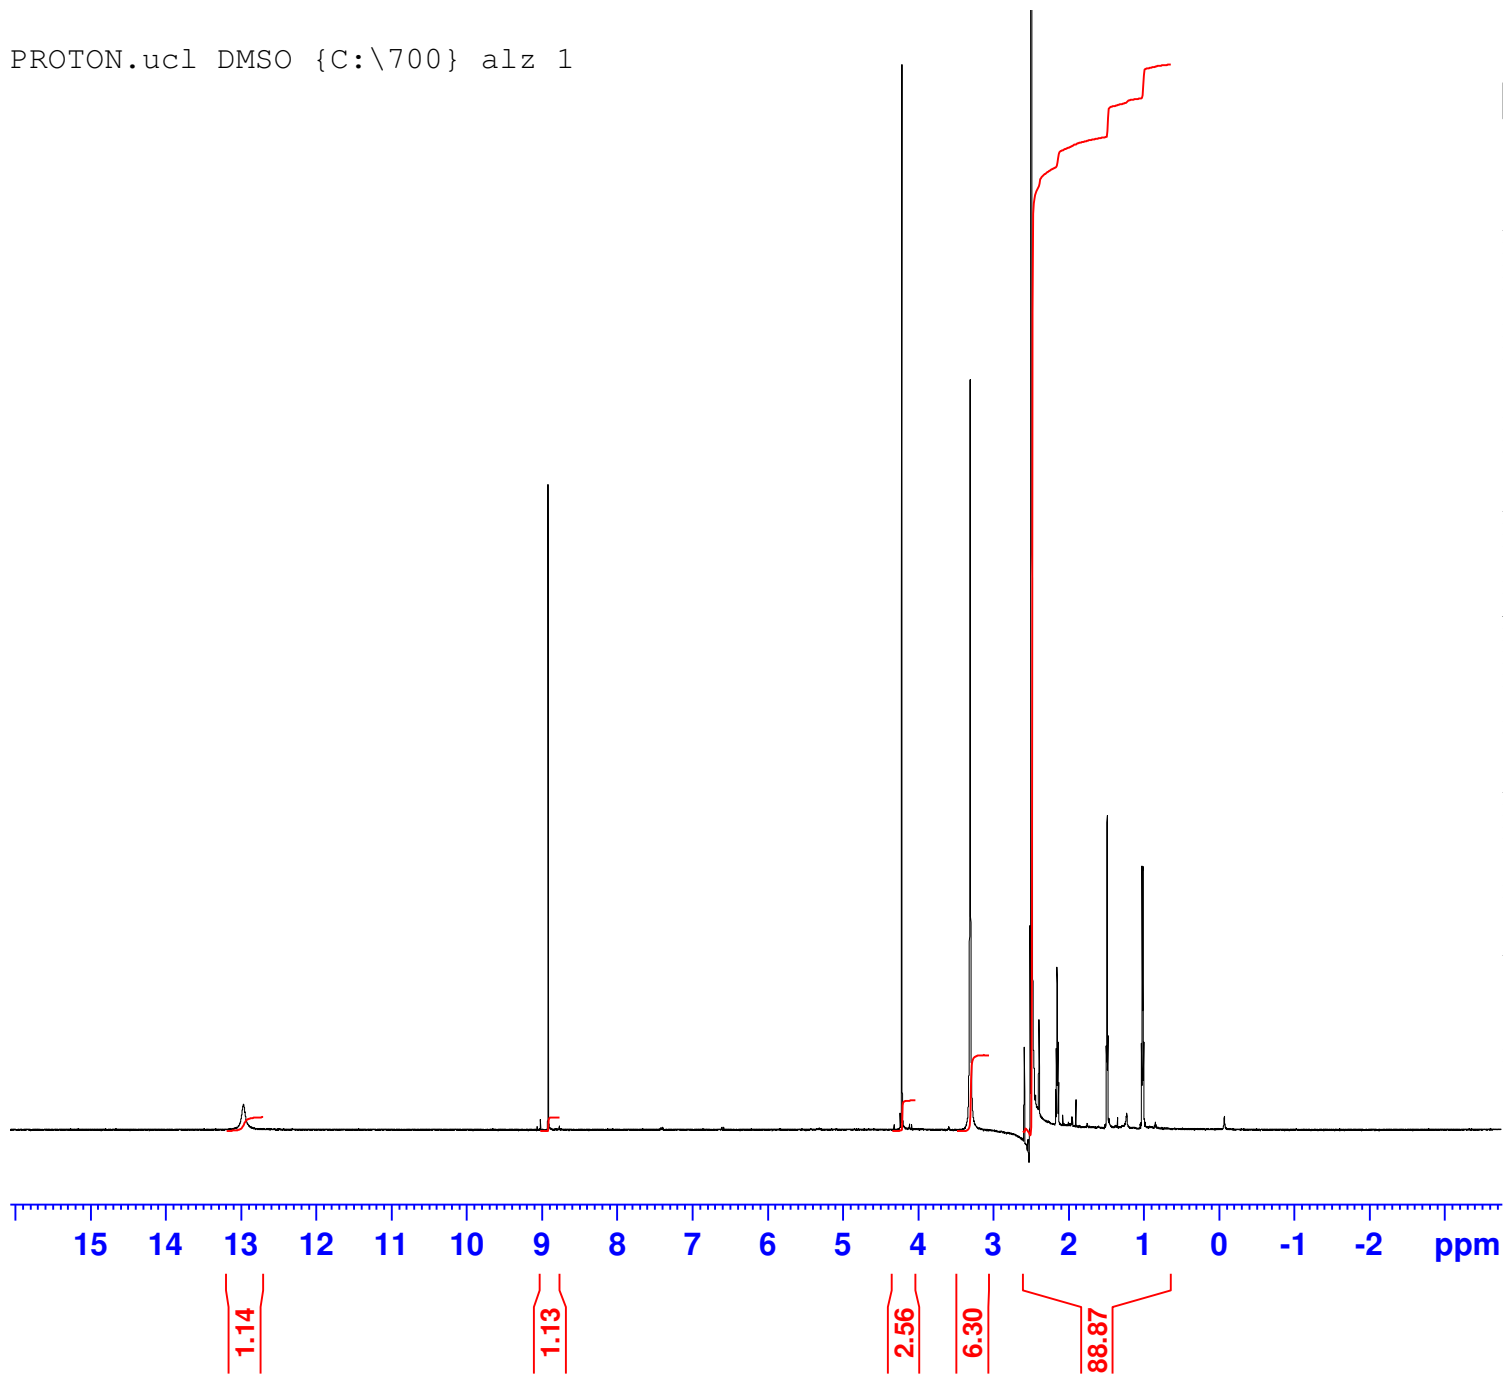

Supplement: Additional file 3 [file 1860-5397-15-271-S3.zip]
