# Supplementary material for: An improved, scalable synthesis of Notum inhibitor LP-922056 using 1-chloro-1,2-benziodoxol-3-one as a superior electrophilic chlorinating agent
Source: Beilstein J Org Chem. 2019 Nov 19;15:2790–7. doi: 10.3762/bjoc.15.271 (PMC6880826; doi:10.3762/bjoc.15.271)
Supplement: File 2 — Profiles of amides. [file Beilstein_J_Org_Chem-15-2790-s002.csv]

Compound	Smiles	Notum IC50 (nM)	Notum IC50 Standard Error of Mean (nM)	MLM Qualifier	MLM Cli (uL/min/mg)	MDCK-mdr1 AB (x10�6 cm/s)	MDCK-mdr1 BA (x10�6 cm/s)	MDCK-mdr1 ER
17a	CN(C)C(=O)CSc1ncnc2c(c(sc12)Cl)C1CC1	7.5	12.4
17b	Clc1sc2c(ncnc2c1C1CC1)SCC(=O)N1CCCCC1	91	67
17c	Clc1sc2c(ncnc2c1C1CC1)SCC(=O)N1CCOCC1	18	8.7	>	500	40	38	0.95
17d	Clc1sc2c(ncnc2c1C1CC1)SCC(=O)N1CCS(=O)(=O)CC1	48
17e	Clc1sc2c(ncnc2c1C1CC1)SCC(=O)N1CC2COCC2C1	10	2.7	>	500
17f	Clc1sc2c(ncnc2c1C1CC1)SCC(=O)N1CC2(COC2)C1	10	3.8		100
17g	Clc1sc2c(ncnc2c1C1CC1)SCC(=O)N1CNC(=O)C1	1.5	0.1		19	3.8	14	3.7
17h	CN1CN(CC1=O)C(=O)CSc1ncnc2c(c(sc12)Cl)C1CC1	1.5	0.2		45	6	13	2.2
17i	Clc1sc2c(ncnc2c1C1CC1)SCC(=O)N1CCNC(=O)C1	7.1	4.1		24	7.9	65	8.2
17j	Clc1sc2c(ncnc2c1C1CC1)SCC(=O)N1CCCNC(=O)C1	36	9.4
17k	Clc1sc2c(ncnc2c1C1CC1)SCC(=O)N1CCNC(=O)CC1	49	23
17l	Clc1sc2c(ncnc2c1C1CC1)SCC(=O)N1CCc2ncccc2C1	4.6	1.8
17m	Clc1sc2c(ncnc2c1C1CC1)SCC(=O)N1CCn2ccnc2C1	2.7	0.4		290	21	25	1.2
17n	Clc1sc2c(ncnc2c1C1CC1)SCC(=O)N1CCn2cncc2C1	2.5	0.1		49	9	31	3.4
17o	Clc1sc2c(ncnc2c1C1CC1)SCC(=O)N1CCc2[nH]cnc2C1	2.3	0.6
17p	Clc1sc2c(ncnc2c1C1CC1)SCC(=O)N1CCn2cnnc2C1	1.2	0.3		29	0.95	93	98
17q	FC(F)(F)c1nnc2n1CCN(C2)C(=O)CSc1ncnc2c(c(sc12)Cl)C1CC1	8	0.7		190	12	34	2.8
17r	Clc1sc2c(ncnc2c1C1CC1)SCC(=O)N1CCn2nncc2C1	2.4	0.1		110	26	28	1.1
